# Supplementary material for: Arctic warming by abundant fine sea salt aerosols from blowing snow
Source: PubMed Central journal article supplement (PMC10482690; doi:10.1038/s41561-023-01254-8), 2023-09-04
Supplement: 41561_2023_1254_MOESM1_ESM.pdf [file 41561_2023_1254_MOESM1_ESM.pdf]

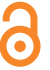

---

# Arctic warming by abundant fine sea salt aerosols from blowing snow

---

In the format provided by the authors and unedited

1 **Supplementary Materials**

2 **The Supplementary file includes:**

3 Supplementary Discussion 1-5;

4 Supplementary Table 1;

5 Supplementary Figures 1-8;

6 Supplementary References.

7

## 8 **Supplementary Discussion**

### 9 **1: Estimation of the blowing snow particle number size distribution for event 3**

10 Given their relatively low concentrations, background aerosols are expected to have a minor  
11 contribution to the aerosol population during the blowing snow events 1 and 2. However, during  
12 the 3<sup>rd</sup> blowing snow event from 22:00 on 7 December to 15:00 on 8 December, the influence of  
13 long-range transported biomass burning plumes<sup>30</sup> is substantial, as evidenced by the elevated BC  
14 mass concentration (Fig. 2c). To evaluate the concentration of blowing-snow-produced aerosols  
15 during event 3, we subtract the contribution of long-range transported biomass burning aerosol  
16 from the total aerosol population using the following approach. On 11 December, the BC mass  
17 concentration is about 40-70 ng cm<sup>-3</sup>, nearly the highest level during this biomass burning event.  
18 In addition, derived sea salt mass concentration is negligible, indicating that the aerosol observed  
19 on 11 December is dominated by biomass burning pollution. The derivation of the sea salt mass  
20 concentration is detailed in the section “Consistencies among aerosol measurements and the  
21 derivation of sea salt mass concentration” in Supplementary Discussion 2. The average particle  
22 number size distribution and CCN concentration on 11 December are therefore considered as the  
23 elevated “background” due to the influence of the biomass burning aerosol. The population of  
24 blowing-snow-produced aerosol is then derived by subtracting the elevated background from the  
25 total aerosol measured during the blowing snow event 3 on 8 December, when BC mass  
26 concentration is above 40 ng cm<sup>-3</sup>.

### 27 **2: Consistencies among aerosol measurements and the derivation of sea salt mass** 28 **concentration**

29 We examine the consistencies among measured particle size distribution, mass concentrations and  
30 particle hygroscopicity. These consistency checks (i.e., closure studies) provide additional high-

31 level data quality assurance. Consistency between particle size distribution and mass  
32 concentrations is examined. The particle volume size distribution is first derived from the  
33 measured particle number size distribution. ACSM measures non-refractory components of  
34 aerosol particles with vacuum aerodynamic diameter ( $d_{va}$ ) up to 1000 nm. The major aerosol  
35 species during MOSAiC are expected to include sulfate, organics and sea salt. The densities of sea  
36 salt, ammonium sulfate, glucose and sodium alginate (the latter two are major marine organic  
37 aerosols<sup>78,79</sup>) are 2.16, 1.77, 1.56 and 1.00 g cm<sup>-3</sup>, respectively. The shape factors of sea salt<sup>80</sup>,  
38 ammonium sulfate<sup>81</sup> and organics<sup>81</sup> are about 1.05-1.10, 1.03-1.07 and 1, respectively. For  
39 spherical particles (shape factor = 1) with a density of 1.6 g cm<sup>-3</sup>, the volume equivalent particle  
40 diameter ( $d_{ve}$ ) corresponding to the ACSM upper size limit is calculated as 625 nm. The total  
41 submicron (i.e.,  $d_{va} < 1000$  nm) aerosol mass concentration is then derived by integrating particle  
42 volume size distribution from 10 to 625 nm ( $M_{10-625nm}$ , Fig. 2c). The impact of assumed particle  
43 density and shape factor on derived mass concentration is discussed below. During non-blowing  
44 snow periods,  $M_{10-625nm}$  shows a strong correlation ( $R^2=0.83$ ,  $p\text{-value}=5.29 \times 10^{-53}$ , Supplementary  
45 Fig. 1a) and agrees well with the non-refractory submicron mass concentration measured by  
46 ACSM ( $M_{ACSM}$ , sum of mass concentrations of sulfate, organics, ammonium and nitrate). During  
47 the blowing snow events,  $M_{10-625nm}$  is substantially higher than  $M_{ACSM}$  due to the presence of SSA.  
48 As sea salt is refractory and cannot be reliably quantified by ACSM, sea salt mass concentration  
49 is therefore derived as the difference between  $M_{10-625nm}$  and  $M_{ACSM}$ . The average sea salt mass  
50 concentrations during the blowing-snow events and non-blowing periods are shown as magenta  
51 bars in Fig. 2e. We note that the sea salt mass concentration derived using the above approach  
52 could potentially include contributions from refractory primary marine organics.

53 The impact of assumed particle density and shape factor on derived mass concentration are  
54 examined separately. We found the derived submicron mass concentration is insensitive to  
55 assumed particle density because the increase of derived mass concentration due to higher particle  
56 density is largely offset by the reduction of the upper limit of  $d_{ve}$  over the expected density range  
57 of  $1.5 - 2 \text{ g cm}^{-3}$ . For example, the upper limit of  $d_{ve}$  decreases from 625 nm to 500 nm when  
58 particle density increases from 1.6 to  $2 \text{ g cm}^{-3}$ . As a result, using a density of 2 instead of  $1.6 \text{ g cm}^{-3}$   
59 leads to an average of  $\sim 7.1\%$  increase in derived mass concentration. The impact of particle  
60 shape on derived mass concentration is also very minor. For particles with a density of  $1.6 \text{ g cm}^{-3}$ ,  
61 using a shape factor of 1.05 instead of 1.00 leads to an average of  $\sim 6.8\%$  decrease in the derived  
62 mass concentration.

63 To check the consistency between hygroscopicity and composition measurements, we derive the  
64 aerosol hygroscopicity from the bulk submicron composition using the mass concentrations of  
65 sulfate, organics, ammonium, nitrate and sea salt. We employ a simplified ion-pairing scheme with  
66 a direct analytical solution to calculate the number of moles of  $(\text{NH}_4)_2\text{SO}_4$ ,  $\text{NH}_4\text{HSO}_4$ ,  $\text{H}_2\text{SO}_4$ ,  
67  $\text{NH}_4\text{NO}_3$ , organics and  $\text{NaCl}$ <sup>82</sup>. As the aerosol is mostly internally mixed,  $\kappa_{\text{CCN}}$  and  $\kappa_{\text{GF}}$  are derived  
68 as the volume average of  $\kappa$  values for the participating species<sup>31,32,82</sup> (hollow squares in  
69 Supplementary Fig. 1c,d). We note that particles larger than  $\sim 250 \text{ nm}$  dominated the bulk  
70 submicron aerosol composition. Nevertheless,  $\kappa_{\text{GF}}$  derived from the bulk composition shows a  
71 good agreement ( $R^2=0.65$ ,  $p\text{-value}=9.84 \times 10^{-45}$ ) with the measured  $\kappa_{\text{GF},250\text{nm}}$  (Supplementary Fig.  
72 1b). The agreements between derived and measured mass concentrations and aerosol  
73 hygroscopicities indicate consistencies among the different measurements and high quality of the  
74 datasets.

### 75 **3: Contribution of the sea salt aerosols emitted from open leads**

76 Arctic open leads are considered an important local source of SSA based on measurements in the  
77 Alaskan Arctic during winter and above the Arctic Ocean up to 88 °N in summer<sup>18,83</sup>. The  
78 contribution of SSA generated from open leads during the blowing snow events is investigated.  
79 Four-day back-trajectories of air masses arriving at the MOSAiC location are simulated using the  
80 HYSPLIT (HYbrid Single-Particle Lagrangian Integrated Trajectory) model<sup>84</sup>. The back-  
81 trajectories are originated at 100 m above sea ice every hour at the MOSAiC location. The fraction  
82 of the time that the air mass is exposed to open leads during the 4 days, referred to as the “average  
83 open lead fraction” is then calculated by combining each back-trajectory with the open lead  
84 fraction map. The air mass is considered “exposed to open leads” when the air mass is above open  
85 leads and the altitude of the air mass is below 300 m (roughly the boundary layer height during  
86 winter and spring in the Arctic). Trajectories with total precipitation during the 4-day period above  
87 20 mm (i.e., strong wet removal) are excluded from further analysis. Daily mean values are then  
88 derived by averaging the average open lead fractions of 24 hourly back-trajectories for each day  
89 (orange bars in Supplementary Fig. 2a,b). The elevation of snowdrift density (i.e., presence of  
90 blowing snow) coincides with high wind speed exceeding the critical threshold (Supplementary  
91 Fig. 2a,b) and fine-mode particle number concentration ( $N_{10-300\text{nm}}$ ) is strongly enhanced during the  
92 blowing snow events (Extended Data Fig. 1). In contrast, the variation of the daily mean open lead  
93 fraction shows no clear correlation with wind speed, suggesting that the open lead fraction does  
94 not explain the episodic nature of the elevated fine-mode particle concentration.

95 We then analyze the particle emission from open leads along the airmass trajectories. Particle net  
96 emission flux from open leads is parameterized as a function of wind speed at 10 m height<sup>83</sup>. Here  
97 the horizontal wind speed from the back-trajectories is used for the parameterization. The particle  
98 emission flux from open leads along an airmass trajectory, referred to as “weighted open lead flux”,

99 is derived by averaging the emission flux along the trajectory, weighted by the local open lead  
100 fraction. We classify the weighted open lead flux into 3 levels (0-0.004, 0.004-0.008  
101 and  $>0.08 \times 10^6 \text{ m}^{-2} \text{ s}^{-1}$ ). The  $N_{10-300\text{nm}}$  frequency distributions under three levels of weighted open  
102 lead flux are very similar. In addition, no correlation between  $N_{10-300\text{nm}}$  and the weighted open lead  
103 flux is found (Supplementary Fig. 3).

104 There are uncertainties associated with the weighted open lead flux derived above. The sea-ice  
105 leads are identified as significant positive local surface temperature anomalies. Some of the leads  
106 may be covered by thin ice<sup>85</sup>, therefore, the open lead fraction and thus the particle flux could be  
107 overestimated. Uncertainty in the wind fields such as sub-grid variability could lead to uncertainty  
108 in calculated back-trajectories. The originating altitude of the back-trajectory could also lead to  
109 additional uncertainty. We repeat the above analysis using the 1-, 2-, 4- and 6-day back-trajectories  
110 originated at altitudes of both 100 and 200 m, and find no correlations between  $N_{10-300\text{nm}}$  and the  
111 weighted open lead fluxes for different originating altitudes or over different lengths of back-  
112 trajectory.

113 Based on current knowledge, the production of SSA from open leads follows similar mechanisms  
114 as sea spray aerosol generation from the open ocean (i.e., wave-breaking processes resulting in  
115 bubble bursting at the ocean surface, creating film and jet drops that form sea spray aerosol<sup>24</sup>).  
116 Previous studies show that under the same wind speed, the particle emission flux over the open  
117 leads is lower than that over the open ocean<sup>83</sup>, due to the reduced wind fetch over open leads.  
118 Measurements over open oceans typically show a much lower fine mode SSA number  
119 concentration under similar wind conditions as during the blowing snow events observed in this  
120 study<sup>23,25</sup>. The spatial coverage of open leads is much lower than sea ice in the central Arctic during  
121 winter/spring. While particles generated from open leads likely contribute to the aerosol population

122 during the events, the lack of correlation between  $N_{10-300\text{nm}}$  and the weighted open lead flux  
123 indicates that open leads are unlikely the major source of fine mode particles. The coincidence of  
124 enhanced  $N_{10-300\text{nm}}$  with the presence of blowing snow suggests that the sublimation of blowing  
125 snow is likely the dominant source of fine-mode particles during the events.

#### 126 **4: Constraining the value of NP using MOSAiC measurements**

127 We carried out simulations with NP=5 and NP=1 and compared them with aerosol measurements  
128 during MOSAiC to constrain the NP value. The simulation with NP=5 shows much better  
129 agreement with measured total particle number concentrations (Supplementary Fig. 5) and the  
130 particle number size distributions (Extended Data Fig. 3 and Supplementary Fig. 6) than the  
131 simulation with NP=1. The mean fractional bias (MFB) of simulated total particle number  
132 concentration during blowing snow events is 9.7% and -27.4% for NP=5 and NP=1, respectively.  
133 The very negative MFB of NP=1 simulation indicates a severe underestimation of blowing-snow-  
134 produced sea salt particle concentration during the blowing snow events. This is also consistent  
135 with the underestimate of particle size distribution in the Aitken mode size range during most  
136 months (Supplementary Fig. 6). In comparison, NP=5 simulation reasonably reproduces the  
137 Aitken mode particle concentration during all months except March, when the Aitken mode  
138 concentration is overestimated. Based on the above analyses, we designated NP=5 simulation as  
139 the base simulation in this study and used NP=5 in additional simulations for the salinity sensitivity  
140 test described below.

#### 141 **5: Sensitivity test of snow salinity in blowing snow parameters**

142 To examine the sensitivity of simulated particle concentrations to the salinities, we carried out  
143 simulation (i.e., low salinity simulation) using FYI and MYI salinities of 0.05 and 0.025 psu,  
144 respectively, a factor of 2 decreases from the base values. The 0.05 psu for the FYI is about the



145 lowest mean value when the snow depth is above 20 cm (ref. <sup>86</sup>). Lower salinities reduce the size  
146 of generated sea salt particles, thus decreasing their contribution to the CCN concentration and the  
147 longwave radiative effect. Therefore, this sensitivity test provides the lower limit estimate of the  
148 CCN production from the blowing snow. We found that reducing the salinities by half only slightly  
149 changes the simulated submicron particle number size distribution (Extended Data Fig. 3 and  
150 Supplementary Fig. 7). The lower salinities lead to a slight decrease (4.9%) of simulated CCN  
151 concentration at a supersaturation of 0.30% (Supplementary Fig. 8), consistent with the minor  
152 impact on simulated size distribution. The above results suggest that the salinities employed in the  
153 base simulation do not lead to a substantial overestimation of the CCN population and the  
154 longwave radiative effect.

155 **Supplementary Table**156 **Supplementary Tab. 1 | Summary of the sample size used to derive the boxplot in Extended**157 **Data Fig. 1**

| <b>Start Time</b> | <b>End Time</b>  | <b>Mean Time</b> | <b>Classification</b> | <b>n for<br/><math>N_{CCN,0.27\%}</math></b> | <b>n for<br/><math>N_{10-300nm}</math></b> | <b>n for<br/><math>N_{&gt;1000nm}</math></b> |
|-------------------|------------------|------------------|-----------------------|----------------------------------------------|--------------------------------------------|----------------------------------------------|
| 2019/11/11 00:00  | 2019/11/11 05:00 | 2019/11/11 02:30 | Non Blowing snow      | 56                                           | 574                                        | 3654                                         |
| 2019/11/11 05:00  | 2019/11/12 05:00 | 2019/11/11 17:00 | Blowing snow          | 36                                           | 283                                        | 1430                                         |
| 2019/11/12 05:00  | 2019/11/16 04:00 | 2019/11/14 04:30 | Non Blowing snow      | 126                                          | 1054                                       | 5397                                         |
| 2019/11/16 04:00  | 2019/11/16 19:00 | 2019/11/16 11:30 | Blowing snow          | 22                                           | 181                                        | 901                                          |
| 2019/11/16 19:00  | 2019/11/23 17:00 | 2019/11/20 06:00 | Non Blowing snow      | 56                                           | 466                                        | 2447                                         |
| 2019/11/23 17:00  | 2019/11/25 11:00 | 2019/11/24 14:00 | Blowing snow          | 61                                           | 495                                        | 2488                                         |
| 2019/11/25 11:00  | 2019/12/02 17:00 | 2019/11/29 02:00 | Non Blowing snow      | 75                                           | 587                                        | 3029                                         |
| 2019/12/02 17:00  | 2019/12/06 00:00 | 2019/12/04 08:30 | Blowing snow          | 117                                          | 933                                        | 4667                                         |
| 2019/12/06 00:00  | 2019/12/07 22:00 | 2019/12/06 23:00 | Non Blowing snow      | 52                                           | 431                                        | 2235                                         |
| 2019/12/07 22:00  | 2019/12/08 15:00 | 2019/12/08 06:30 | Blowing snow          | 25                                           | 200                                        | 1021                                         |
| 2019/12/08 15:00  | 2020/01/02 08:00 | 2019/12/20 23:30 | Non Blowing snow      | 539                                          | 4286                                       | 22775                                        |
| 2020/01/02 08:00  | 2020/01/03 00:00 | 2020/01/02 16:00 | Blowing snow          | 23                                           | 91                                         | 947                                          |
| 2020/01/03 00:00  | 2020/01/13 20:00 | 2020/01/08 10:00 | Non Blowing snow      | 266                                          | 2017                                       | 11151                                        |
| 2020/01/13 20:00  | 2020/01/14 07:00 | 2020/01/14 01:30 | Blowing snow          | 15                                           | 108                                        | 652                                          |
| 2020/01/14 07:00  | 2020/01/15 08:00 | 2020/01/14 19:30 | Non Blowing snow      | 36                                           | 293                                        | 1490                                         |
| 2020/01/15 08:00  | 2020/01/16 08:00 | 2020/01/15 20:00 | Blowing snow          | 30                                           | 254                                        | 1354                                         |
| 2020/01/16 08:00  | 2020/01/31 10:00 | 2020/01/23 21:00 | Non Blowing snow      | 270                                          | 2168                                       | 11270                                        |
| 2020/01/31 10:00  | 2020/02/01 02:00 | 2020/01/31 18:00 | Blowing snow          | 23                                           | 188                                        | 954                                          |
| 2020/02/01 02:00  | 2020/02/02 21:00 | 2020/02/01 23:30 | Non Blowing snow      | 12                                           | 96                                         | 581                                          |
| 2020/02/02 21:00  | 2020/02/03 05:00 | 2020/02/03 01:00 | Blowing snow          | 12                                           | 94                                         | 479                                          |
| 2020/02/03 05:00  | 2020/02/12 12:00 | 2020/02/07 20:30 | Non Blowing snow      | 325                                          | 2425                                       | 13262                                        |
| 2020/02/12 12:00  | 2020/02/14 15:00 | 2020/02/13 13:30 | Blowing snow          | 75                                           | 602                                        | 3041                                         |
| 2020/02/14 15:00  | 2020/02/18 11:00 | 2020/02/16 13:00 | Non Blowing snow      | 127                                          | 999                                        | 5146                                         |
| 2020/02/18 11:00  | 2020/02/22 09:00 | 2020/02/20 10:00 | Blowing snow          | 125                                          | 1001                                       | 5129                                         |
| 2020/02/22 09:00  | 2020/02/23 11:00 | 2020/02/22 22:00 | Non Blowing snow      | 39                                           | 308                                        | 1553                                         |
| 2020/02/23 11:00  | 2020/02/26 06:00 | 2020/02/24 20:30 | Blowing snow          | 93                                           | 751                                        | 3945                                         |
| 2020/02/26 06:00  | 2020/03/06 05:00 | 2020/03/01 17:30 | Non Blowing snow      | 161                                          | 1225                                       | 7045                                         |
| 2020/03/06 05:00  | 2020/03/07 12:00 | 2020/03/06 20:30 | Blowing snow          | 41                                           | 279                                        | 1682                                         |
| 2020/03/07 12:00  | 2020/03/15 07:00 | 2020/03/11 09:30 | Non Blowing snow      | 87                                           | 623                                        | 3594                                         |
| 2020/03/15 07:00  | 2020/03/16 21:00 | 2020/03/16 02:00 | Blowing snow          | 54                                           | 368                                        | 2254                                         |
| 2020/03/16 21:00  | 2020/03/26 20:00 | 2020/03/21 20:30 | Non Blowing snow      | 148                                          | 1165                                       | 6153                                         |
| 2020/03/26 20:00  | 2020/03/29 12:00 | 2020/03/28 04:00 | Blowing snow          | 21                                           | 151                                        | 1201                                         |
| 2020/03/29 12:00  | 2020/04/01 21:00 | 2020/03/31 04:30 | Non Blowing snow      | 29                                           | 238                                        | 1225                                         |
| 2020/04/01 21:00  | 2020/04/03 12:00 | 2020/04/02 16:30 | Blowing snow          | 52                                           | 414                                        | 2130                                         |
| 2020/04/03 12:00  | 2020/05/01 00:00 | 2020/04/17 06:00 | Non Blowing snow      | 413                                          | 3327                                       | 17659                                        |

158

159 **Supplementary Figures**

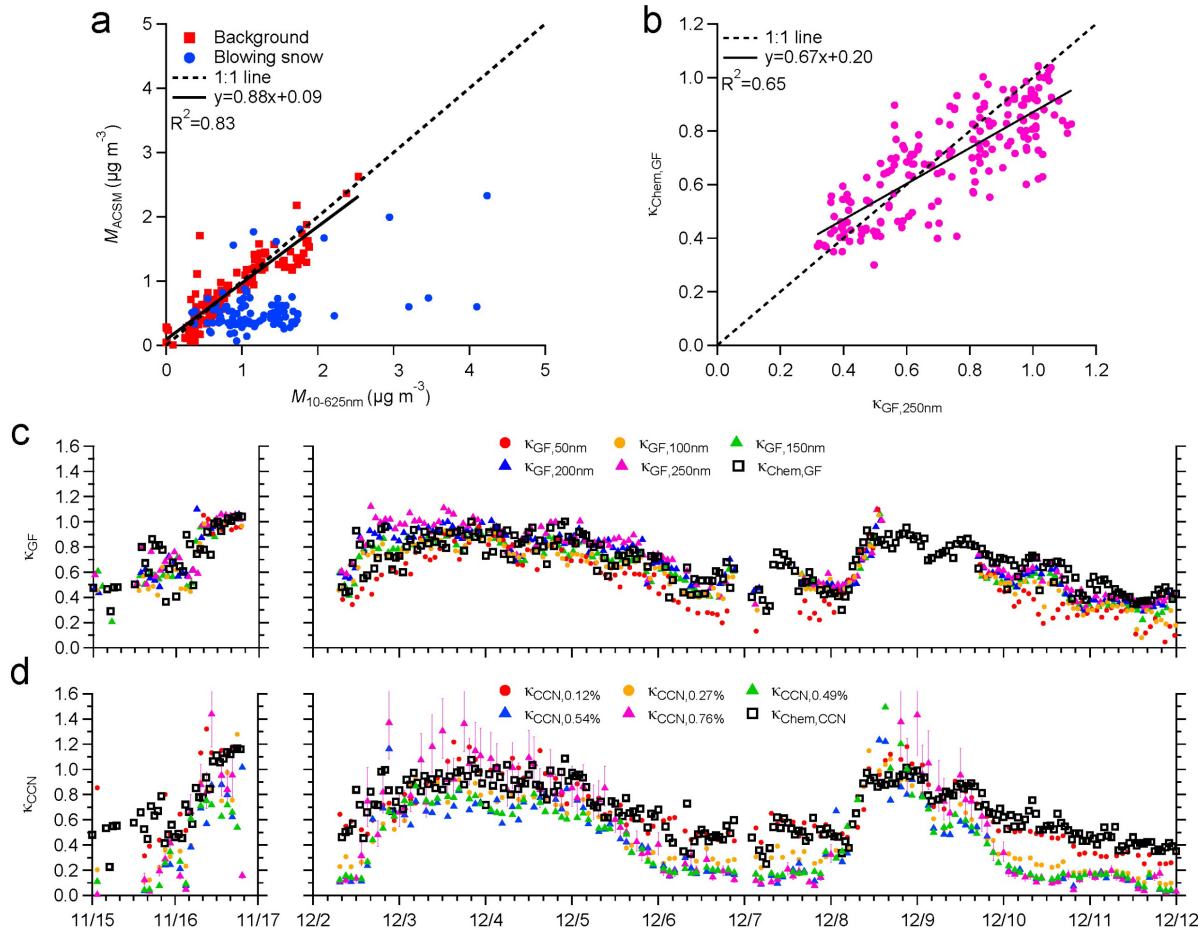

160

161 **Supplementary Fig. 1 | Closure study between particle number size distribution, chemical**

162 **composition and particle hygroscopicity. a**, Comparison of submicron non-refractory mass

163 concentration (i.e., the sum of sulfate, organics, ammonium and nitrate) measured by ACSM

164 ( $M_{ACSM}$ ) with mass concentration of particles with volume equivalent diameter between 10 to 625

165 nm derived from particle size distribution ( $M_{10-625nm}$ ) during the non-blowing snow periods (red

166 squares) and blowing snow events (blue dots). During non-blowing snow periods, the square of

167 the correlation coefficient ( $R^2$ ) between  $M_{ACSM}$  and  $M_{10-625nm}$  is 0.83. **b**, Comparison of particle

168 hygroscopicity derived from chemical composition under sub-saturation ( $\kappa_{Chem,GF}$ ) with the

169 particle hygroscopicity derived from particle growth factor for 250 nm particles ( $\kappa_{GF,250nm}$ ). The

170 square of the  $R^2$  between  $\kappa_{\text{Chem,GF}}$  and  $\kappa_{\text{GF},250\text{nm}}$  is 0.65. **c**, Time series of aerosol hygroscopicity  
171 derived from growth factor ( $\kappa_{\text{GF}}$ ) for particles of 50, 100, 150, 200 and 250 nm ( $\kappa_{\text{GF}}$ ) and aerosol  
172 hygroscopicity under sub-saturation derived from bulk submicron aerosol composition ( $\kappa_{\text{Chem,GF}}$ ).  
173 **d**, Time series of aerosol hygroscopicity under supersaturation of 0.12%, 0.27%, 0.49%, 0.54%  
174 and 0.76% ( $\kappa_{\text{CCN}}$ ) derived from cloud condensation nuclei activation and aerosol hygroscopicity  
175 under supersaturation derived from bulk submicron aerosol composition ( $\kappa_{\text{Chem,CCN}}$ ). Error bars  
176 represent the measurement uncertainty of  $\kappa_{\text{CCN},0.75\%}$  (explained in Methods).

177

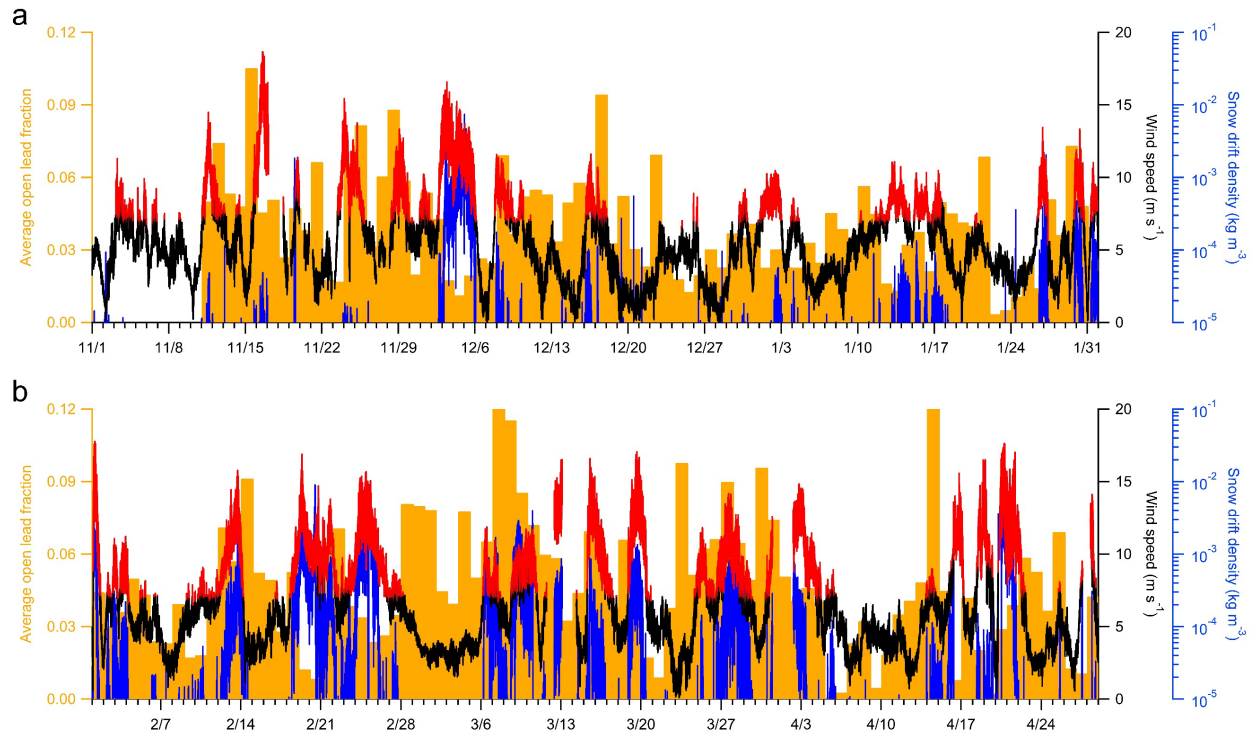

178

179 **Supplementary Fig. 2 | Blowing snow events and the variation of Arctic open lead fraction.**

180 The time series (from November to January in panel **a** and February to April in panel **b**) of the  
 181 daily mean value of the average open lead fraction along the backward trajectory (orange bars),  
 182 snowdrift density (blue line), and wind speed above the critical threshold (red line) and below the  
 183 threshold (black line).

184

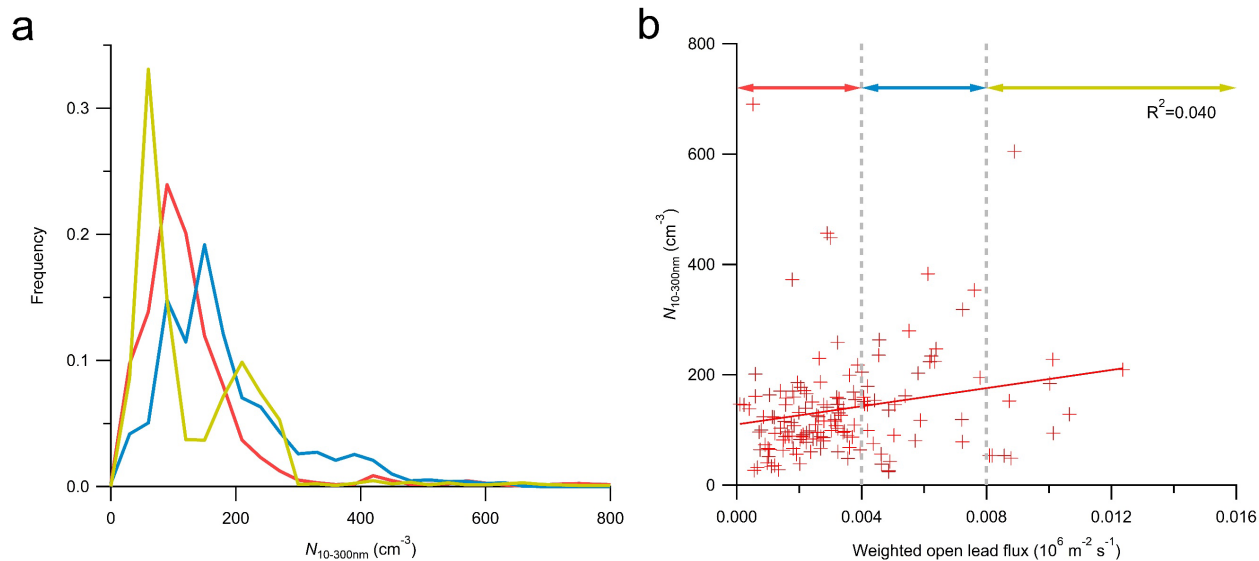

185  
 186 **Supplementary Fig. 3 | The relationship between fine-mode particle number concentration**  
 187 **and weighted particle emission flux from open leads along air mass back-trajectory. a,** The  
 188 frequency distribution of fine-mode particle number concentration ( $N_{10-300\text{nm}}$ ) for three different  
 189 ranges of weighted particle emission flux from open leads along air mass trajectory (weighted open  
 190 lead flux,  $0-0.004 \times 10^6 \text{ m}^{-2} \text{ s}^{-1}$  in red,  $0.004-0.008 \times 10^6 \text{ m}^{-2} \text{ s}^{-1}$  in blue and  $>0.008 \times 10^6 \text{ m}^{-2} \text{ s}^{-1}$  in  
 191 yellow). **b,** The correlation between  $N_{10-300\text{nm}}$  and the weighted open lead particle flux.  
 192

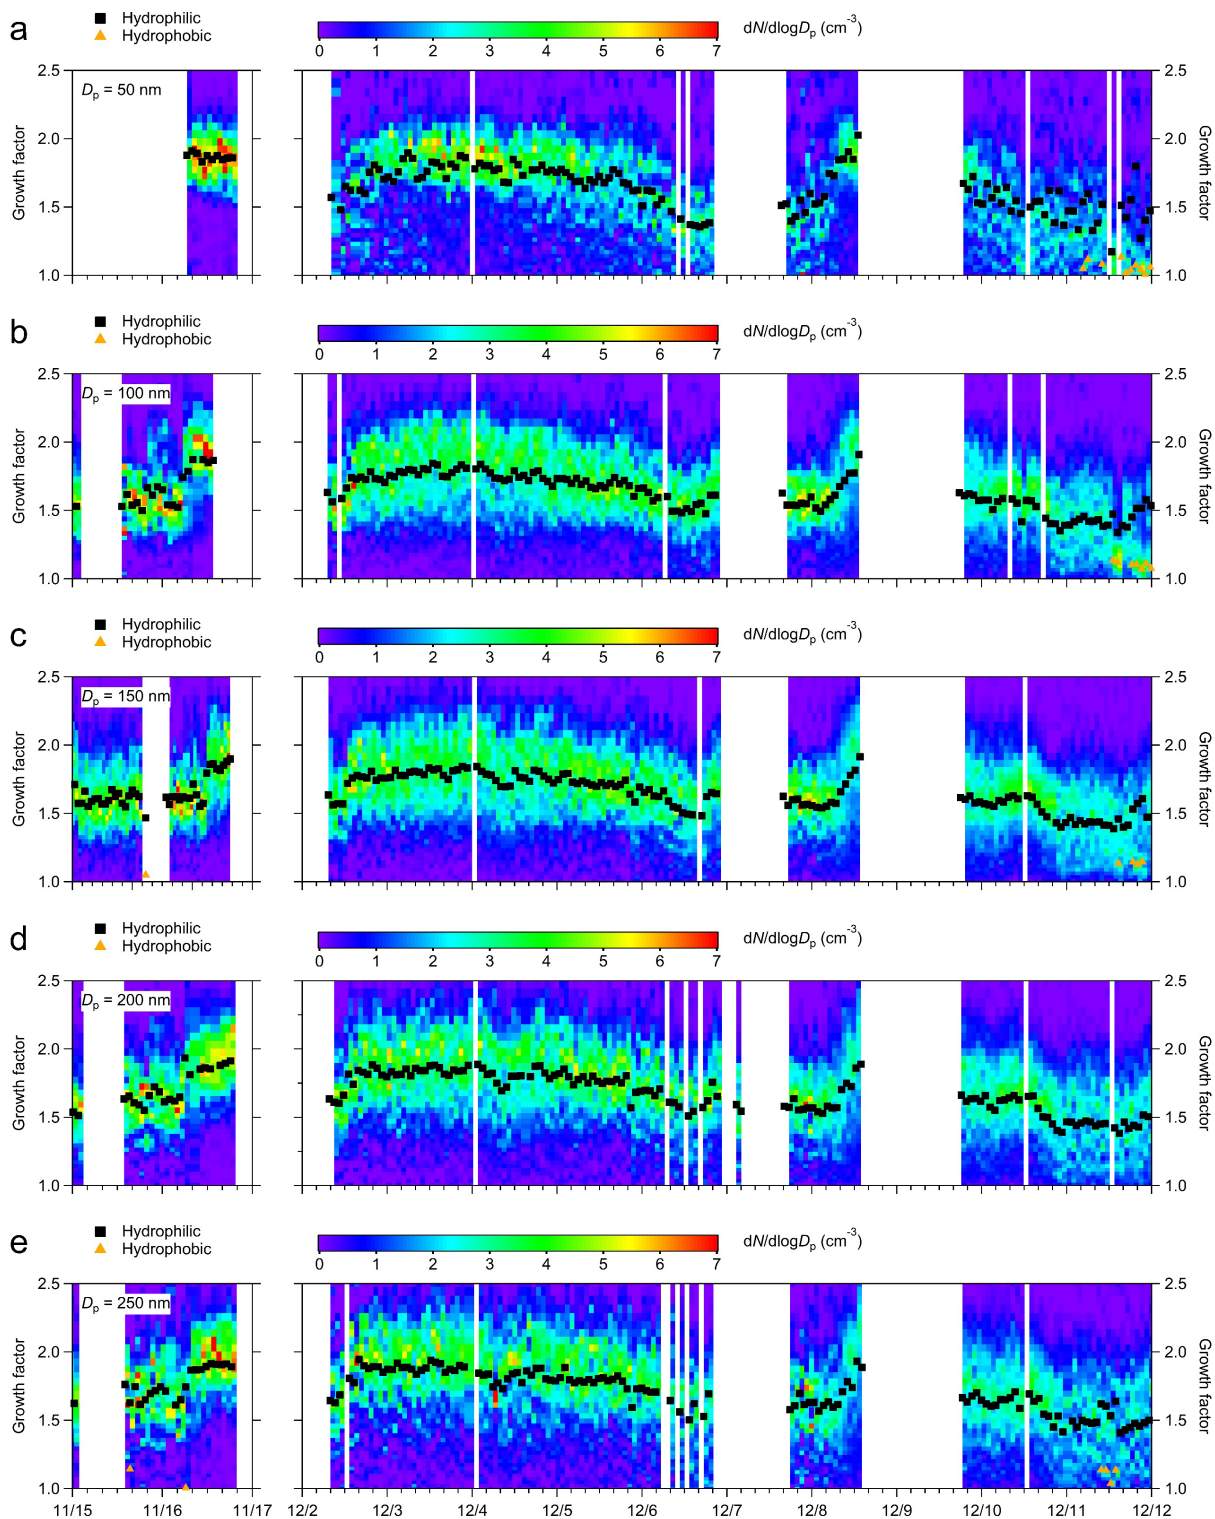

193

194 **Supplementary Fig. 4 | Particle growth factor measured by the HTDMA. a,** Contour plot of  
 195 particle growth factor (GF) distribution for 50 nm dry particles. The average growth factor of

196 hydrophilic mode ( $GF \geq 1.15$ ) and hydrophobic mode ( $GF < 1.15$ ) are shown in black squares and  
197 orange triangles, respectively. **b-e**, Same as plot **a**, but for 100, 150, 200 and 250 nm dry particles.  
198



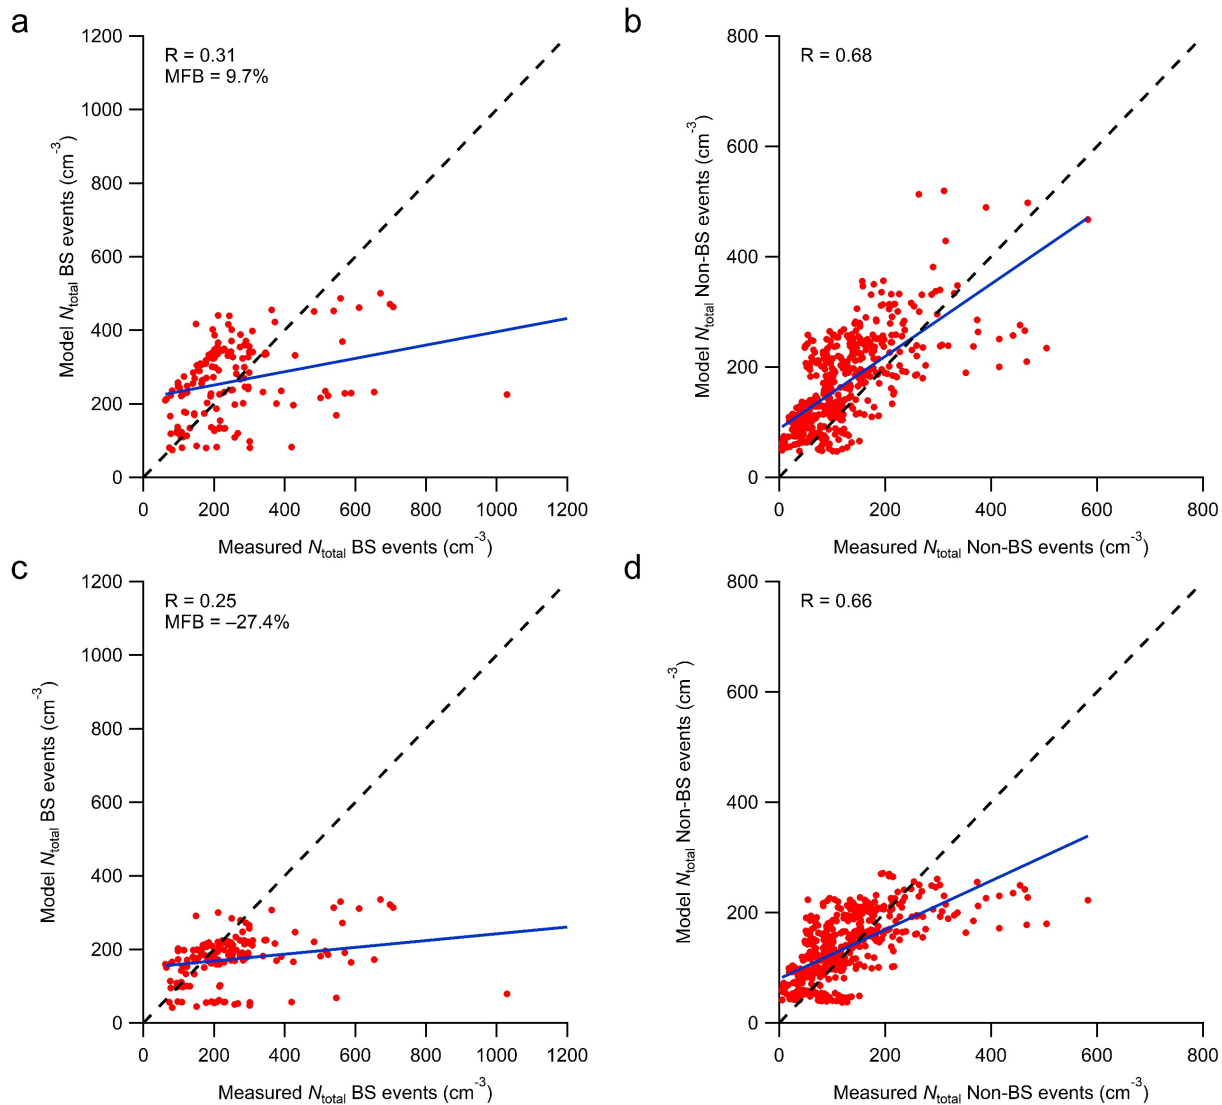

199

200 **Supplementary Fig. 5 | Comparison between model-simulated and measured particle**  
 201 **number concentration.** The correlation between model-simulated (NP=5, base simulation) and  
 202 measured total particle number concentration during blowing snow events in panel **a** and non-  
 203 blowing snow periods in panel **b**. **c-d**, The same correlation plots for the NP=1 simulation.

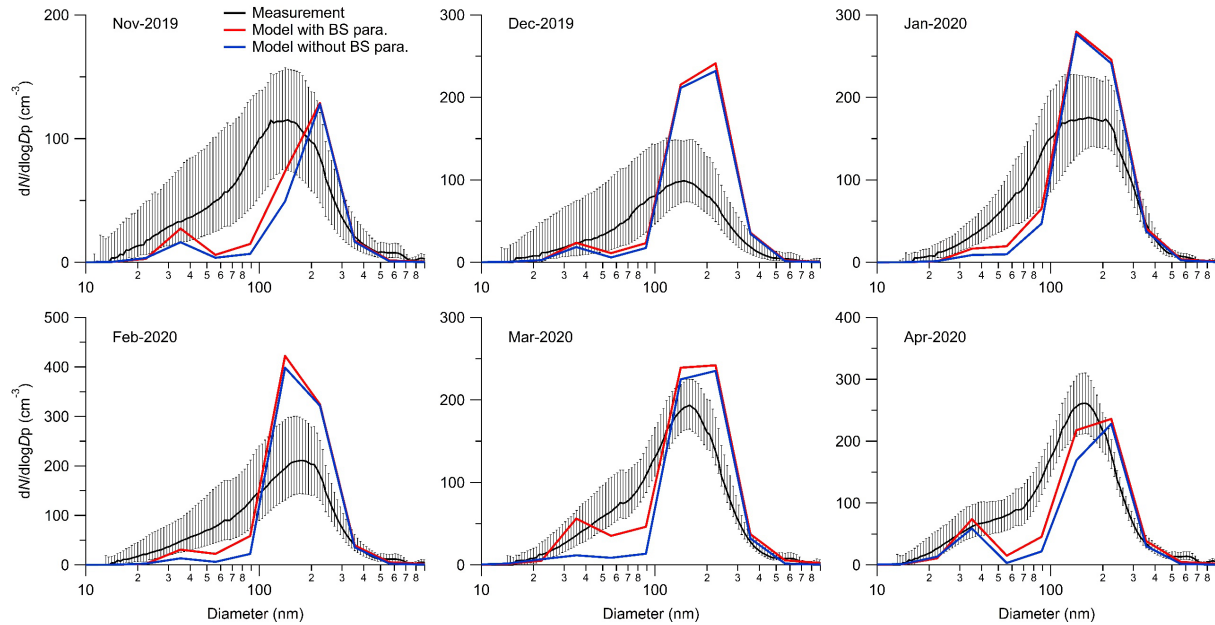

204

205 **Supplementary Fig. 6 | Comparison between model-simulated (NP=1) and measured particle**

206 **size distribution.** The monthly median values of the measured particle number size distribution

207 are shown in black lines, with error bars showing the 25<sup>th</sup> to 75<sup>th</sup> percentiles. The monthly median

208 values of particle number size distribution from NP=1 simulation with and without blowing-snow-

209 produced SSA included are shown in red and blue lines, respectively.

210

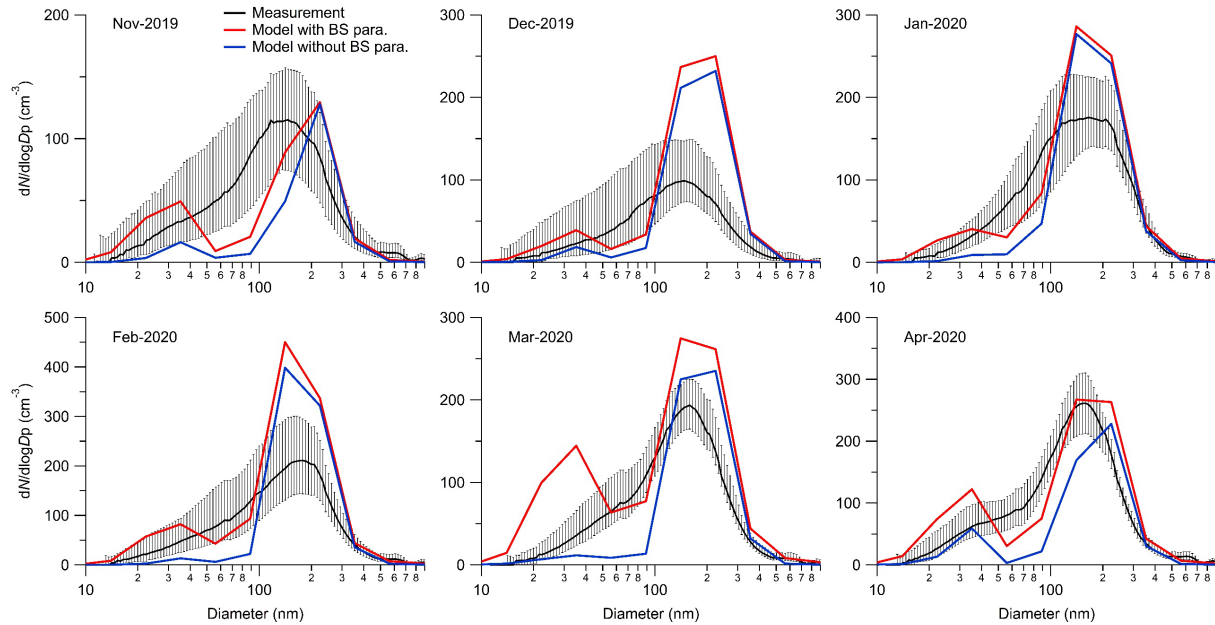

211

212 **Supplementary Fig. 7 | Comparison between model-simulated (NP=5, low salinity) and**

213 **measured particle size distribution.** The monthly median values of the measured particle number

214 size distribution are shown in black lines, with error bars showing the 25<sup>th</sup> to 75<sup>th</sup> percentiles. The

215 monthly median values of particle number size distribution from the low salinity simulation (NP=5)

216 with and without blowing-snow-produced SSA included are shown in red and blue lines,

217 respectively.

218

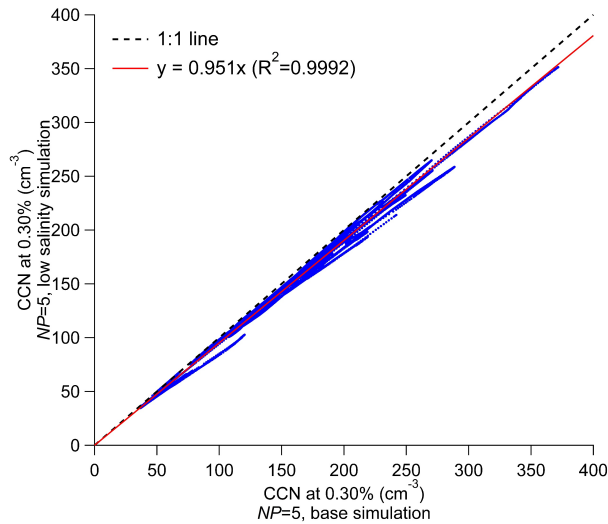

219

220 **Supplementary Fig. 8 | Comparison of the model-simulated CCN concentrations between**  
 221 **the base and low salinity simulations.** Total CCN concentration at 0.3% supersaturation from  
 222 the low salinity simulation as a function of the CCN concentration from the base simulation  
 223 (blue dots). The dashed black line represents a 1:1 reference line. The red line represents a linear  
 224 fit with an intercept of 0.

225 **Supplementary References**

- 226 78. Hasencz, E. S., Kaluarachchi, C. P., Lee, H. D., Tivanski, A. V & Stone, E. A.  
227 Saccharide Transfer to Sea Spray Aerosol Enhanced by Surface Activity, Calcium, and  
228 Protein Interactions. *ACS Earth Sp. Chem.* **3**, 2539–2548 (2019).
- 229 79. Cochran, R. E. *et al.* Molecular Diversity of Sea Spray Aerosol Particles: Impact of Ocean  
230 Biology on Particle Composition and Hygroscopicity. *Chem* **2**, 655–667 (2017).
- 231 80. Zieger, P. *et al.* Revising the hygroscopicity of inorganic sea salt particles. *Nat. Commun.*  
232 **8**, 15883 (2017).
- 233 81. Zelenyuk, A., Cai, Y. & Imre, D. From Agglomerates of Spheres to Irregularly Shaped  
234 Particles: Determination of Dynamic Shape Factors from Measurements of Mobility and  
235 Vacuum Aerodynamic Diameters. *Aerosol Sci. Technol.* **40**, 197–217 (2006).
- 236 82. Gysel, M. *et al.* Closure study between chemical composition and hygroscopic growth of  
237 aerosol particles during TORCH2. *Atmos. Chem. Phys.* **7**, 6131–6144 (2007).
- 238 83. Nilsson, E. D. *et al.* Turbulent aerosol fluxes over the Arctic Ocean: 2. Wind-driven  
239 sources from the sea. *J. Geophys. Res. Atmos.* **106**, 32139–32154 (2001).
- 240 84. Stein, A. F. *et al.* NOAA’s HYSPLIT Atmospheric Transport and Dispersion Modeling  
241 System. *Bull. Am. Meteorol. Soc.* **96**, 2059–2077 (2015).
- 242 85. Smith, S. D., Muench, R. D. & Pease, C. H. Polynyas and leads: An overview of physical  
243 processes and environment. *J. Geophys. Res. Ocean.* **95**, 9461–9479 (1990).
- 244 86. Confer, K. L. *et al.* Impact of Changing Arctic Sea Ice Extent, Sea Ice Age, and Snow  
245 Depth on Sea Salt Aerosol From Blowing Snow and the Open Ocean for 1980–2017. *J.*  
246 *Geophys. Res. Atmos.* **128**, e2022JD037667 (2023).
- 247
